# Supplementary material for: Transcriptome-wide and expression analysis of the NAC gene family in pepino (Solanum muricatum) during drought stress
Source: PeerJ. 2021 Mar 29;9:e10966. doi: 10.7717/peerj.10966 (PMC8015785; doi:10.7717/peerj.10966)
Supplement: Supplemental Information 1 [file peerj-09-10966-s001.xlsx]

## Sheet: Sheet1
SmNAC1	root			clum			leaf			flower			ck
target
reference	25.3042	24.7904	24.6387	23.8634	22.7489	22.857	21.9703	22.9743		25.8336	26.2249	26.3946	22.5836	22.2652	22.4188
SmNAC2	root			clum			leaf			flower			ck
target				37.5327			33.4692	32.6327					37.7336	35.1902
reference	25.3852	26.1322	24.9921	22.5564	22.5313	21.916	18.4771	21.2077	19.6373	25.4169	25.7056	25.4034	21.8166	21.9172	22.2832
SmNAC3	root			clum			leaf			flower			ck
target	37.2907	36.1036					35.2339						37.8837
reference	20.528	21.7077	20.7128	23.5483	23.5237	22.6158	25.737	25.4534	25.931	27.054	27.1355	28.5943	22.9191	22.7893	22.9256
SmNAC4	root			clum			leaf			flower			ck
target	30.2617	29.8279	29.8555	30.7311	30.336	30.2599	32.3839	30.3738		29.9158	29.415	30.1406	31.8027	31.4803	31.2498
reference	22.309	21.7163	18.2852	23.5097	23.4228	23.3943	31.1803	31.469	31.2715	22.8682	23.3388	22.8271	25.3617	24.7919	25.6728
SmNAC5	root			clum			leaf			flower			ck
target							29.7297						35.5682
reference	26.5629	26.7403	26.9949	21.8109	22.7632	22.8429	22.5126	21.7754	21.7223	26.9206	26.6597	26.6292	23.2418	23.3574
SmNAC6	root			clum			leaf			flower			ck
target
reference	27.4893	27.5112	27.5258	23.33	22.6526	22.6915	20.9942	20.8884	22.9733	26.11	26.5989	26.3008	21.9861	22.5134	22.2704
SmNAC7	root			clum			leaf			flower			ck
target
reference	31.5592	30.4125	32.833	22.9325	23.7872	22.5551	22.2453	23.2926	23.4878	26.6176	26.7104	26.4444	22.7364	21.2654	22.6794
SmNAC8	root			clum			leaf			flower			ck
target							34.2124	35.7868		33.4131			34.1453
reference	30.9908	25.5529	25.4433	21.641	22.7679	22.7694	27.954	26.41	26.6008	22.7282	22.8895	20.5491	21.9829	20.756	22.4337
SmNAC9	root			clum			leaf			flower			ck
target	37.4918	36.5481		37.4573			36.6299			35.6087			37.5032	35.0798
reference	27.8096	27.3638	27.2811	22.5854	23.5595	23.8261	22.7784	22.4991	21.8483	25.45	26.7351	25.6913	23.4887	24.5108	23.9773
SmNAC10	root			clum			leaf			flower			ck
target				35.245			36.6654	37.1791	35.669				37.2683
reference	27.7104	27.658	27.3851	22.423	23.1482	23.2322	20.7557	22.4373	23.3366	28.4856	26	25.5463	22.9892	22.5825	20.193
SmNAC11	root			clum			leaf			flower			ck
target
reference	29.3333	27.4409	26.967	22.6729	23.0976	22.2752	21.7392	22.499	22.4209	25.0775	24.9604	25.2966	23.2172	23.2795	23.2944
SmNAC12	root			clum			leaf			flower			ck
target										35.9208			37.842
reference	28.9789	29.1255	29.1543	23.6105	23.8266	23.8328	24.6937	23.5187	24.2509	26.5716	26.5787	25.9599	24.364	24.4247	24.182
SmNAC13	root			clum			leaf			flower			ck
target	38.3232	37.9113	37.5316	33.9378			33.1969	29.3744	32.3317	36.7624	33.9112	31.8781	34.2357
reference	30.1473	29.8236	29.8198	22.5163	22.2247	22.7447	21.9773		22.1445	24.6071	24.9701	24.629	23.0949	23.6376	23.7894
SmNAC83	root			clum			leaf			flower			ck
target							35.9085			36.4515			39.518
reference	29.4441	29.5967		22.6608	22.9899	23.4999	21.9937	21.9308	21.9363	24.542	24.7854	25.2703	23.9038	23.9067	24.3645
SmNAC15	root			clum			leaf			flower			ck
target	29.2921	29.3899	29.6911	29.4228	29.2048	26.5776	27.3938	28.9591	28.9057	29.7233	28.7871	28.739	29.3837	29.3936	29.4503
reference	29.6555	29.3331	29.7612	22.7289	22.9785	21.3266	22.6978	22.7678	22.6094	22.8861	22.8264	22.7345	25.1556	26.4176	26.3507
SmNAC16	root			clum			leaf			flower			ck
target				36.5835
reference	29.6624	29.4453	29.8629	22.9883	21.9256	22.7967	22.9757	22.4506	22.3428	22.7004	22.7483	23.2081	26.7673	26.6954	26.6018
SmNAC17	root			clum			leaf			flower			ck
target	33.9152	34.4764					31.8962	36.1251		36.8209	35.8281		34.9227
reference	29.9245	29.8743	30.2554	21.5386	21.6385	21.81	21.2579	21.8255	21.4914	21.459	21.9484	21.8559	24.3765	24.9572	25.0583
SmNAC18	root			clum			leaf			flower			ck
target	37.8735			33.8293	34.76		33.4499	33.514					33.383	34.8749	31.5272
reference	29.9571	30.3552	29.8982	22.3613	21.696	22.4086	21.7205	21.6999	21.4815	22.2487	22.3628	22.4696	24.9724	24.4537	24.367
SmNAC19	root			clum			leaf			flower			ck
target	34.9049	35.0542	35.4019									34.6328		33.8862	32.3522
reference	30.4921	29.8887	30.1118	21.7183	22.2111	21.5447	21.7552	21.6747	21.7241	21.7067	22.139	21.3285	24.7748	25.4428	24.8516
SmNAC20	root			clum			leaf			flower			ck
target							35.6533			36.9908			38.5245
reference	31.5239	31.4435		22.2659	21.9089	21.9828	21.5361	21.7303	21.6342	21.6388	20.616	21.6925	21.3437	21.3987	21.4694
SmNAC21	root			clum			leaf			flower			ck
target
reference	30.7598	31.185	31.1141	20.3654	21.816	21.9574	22.0793	21.9732	22.546	22.6472	22.4192	22.1579	29.8897	27.7842
SmNAC22	root			clum			leaf			flower			ck
target										12.8685
reference	32.3763	32.4972	32.7091	22.9859	23.0707	22.7815	22.6079	22.4342	22.641	22.6916	22.8589	22.814	26.6867	26.3133	26.8597
SmNAC23	root			clum			leaf			flower			ck
target	31.3652	30.9272	28.4086	30.3959	30.3991	29.5461	30.6698	31.6315	30.6718	30.3761	29.8176	30.3277	29.917	30.4378	29.7627
reference	31.6336	31.8353	30.6732	23.2737	22.2586	23.7968	22.6177	22.4243	22.2505	21.8674	21.8766	22.354	25.9457	26.9842	26.6698
SmNAC24	root			clum			leaf			flower			ck
target
reference	33.1091	32.5377	35.481	24.894	25.4167	25.833	23.3153	23.1378	23.5185	22.2565	22.3402	23.1876	28.4161	28.2633	28.2251
SmNAC25	root			clum			leaf			flower			ck
target	33.9875	34.7496	34.0181	28.6897	29.0359	28.417	26.2012	26.4515	26.6694	25.9729	25.5234	25.8184	33.7326	32.9059	32.6547
reference	29.6056	31.1322	29.8221	22.9923	22.9749	22.9753	21.1362	21.5763	21.3348	22.4787	21.8553	22.8462	23.743	24.6922	24.5508
SmNAC26	root			clum			leaf			flower			ck
target
reference	30.9641	32.3131	31.2826	22.5523	22.7282	22.4436	20.9915	20.8793	20.8444	21.214	21.5219	21.4631	25.3521	25.6605	25.9693
SmNAC27	root			clum			leaf			flower			ck
target				30.5353	30.899	30.6344	32.6461	32.9741	34.6861	33.9489	33.7458		36.9697
reference	30.9799	30.4945		24.681	24.6648	24.7175	22.2896	21.6813	21.4961	23.2966	23.1921	23.3475	24.454	24.2619	24.405
SmNAC28	root			clum			leaf			flower			ck
target	20.855
reference	34.4551	34.7063	35.3703	25.7549	25.5761	25.7769	22.6856	23.5126	25.2985	24.2718	25.6677	24.8608	28.3421	27.7937	28.7059
SmNAC29	root			clum			leaf			flower			ck
target	13.8014									14.7846	38.6704
reference	29.5213	33.4673		26.668	24.48	25.9222	22.9323	21.3317	23.947	24.176	25.3563	24.8763	30.3021	29.682	29.0769
SmNAC30	root			clum			leaf			flower			ck
target
reference	33.2226	31.7402	31.8538	22.477	22.5796	22.5593	21.6945	21.8915	21.686	21.5081	21.5478	21.6844	25.8092	26.059	25.9836
SmNAC31	root			clum			leaf			flower			ck
target	37.8554			36.3356			30.6569			34.9693			32.935	33.9769
reference	30.6163	29.9089	30.3647	23.6716	24.0427	24.6745	22.8206	21.0847	22.9894	22.4496	22.3063	21.6692	23.4249	24.2139
SmNAC32	root			clum			leaf			flower			ck
target				29.8027	29.6337	29.9867	23.8583	23.7068	24.0607	22.7764	22.7508	19.9103	29.3846	29.1614	28.9636
reference	31.7653	31.5628	30.7294	25.7591	25.6546	25.9768	23.5754	23.2556	23.4457	24.6839	24.6771	24.7465	25.7367	25.4198	25.8158
SmNAC33	root			clum			leaf			flower			ck
target	34.9737			24.2496	24.6978	24.5775	27.1313	27.3053	27.1688	28.817	29.0608	29.6469	28.8742	28.4919	29.2224
reference	31.6677	30.9378	31.6083	24.6394	24.5658	24.2024	22.1731	22.2537	21.8211	23.2916	23.1981	23.1979	23.9661	24.2867	23.5764
SmNAC34	root			clum			leaf			flower			ck
target				33.3777	35.6927	33.8759	35.8112	35.5046		35.5564	34.8268	36.7767	37.5439	37.6015
reference	32.4465	32.6299		25.8188	26.1243	25.7196	21.6372	23.207	22.6029	24.4329	23.8539	23.9235	24.668	25.2471
SmNAC35	root			clum			leaf			flower			ck
target	36.7487	36.9045
reference	32.9885	32.3361	30.8125	22.6328	22.85	23.1304	21.285	22.5632	21.4552	21.7088	22.1611	22.4841	26.7003	30.4296	24.8814
SmNAC36	root			clum			leaf			flower			ck
target	35.496	34.8581	34.182	27.9637	28.4726	27.7602	26.2659	26.26	26.5453	24.989	24.8282	24.7718	27.7484	28.86	29.496
reference	31.3988	30.9965	30.655	24.868	25.3719	24.8146	22.0919	21.7356	21.9375	23.2395	23.8207	23.6282	24.2587	23.4118	24.1958
SmNAC37	root			clum			leaf			flower			ck
target	35.5936			29.011	30.2647	29.7395	27.3936	28.567	27.8864	28.9612	29.5119	29.9081	30.7104	31.8152	30.4388
reference	30.6593	29.8647	29.86	25.4286	25.2903	25.3143	21.3108	22.5203	21.5844	23.7982	23.8155	23.7337	24.7827	24.6792	24.4321
SmNAC38	root			clum			leaf			flower			ck
target	33.5705	34.8012	32.6579	29.2634	29.6904	29.1643	29.465	30.2202	30.6003	30.9808	31.8779	30.781	35.5689		33.2371
reference	24.845	25.47	23.1944	19.768	19.867	19.352	21.7002	21.7065	21.5534	21.753	23.7099	19.5874	23.4905	19.6087	19.358
SmNAC100	root			clum			leaf			flower			ck
target							30.8176	31.702	30.1948	33.5122	34.5732	32.9997	36.6901
reference	31.978	32.8274	33.3854	27.4052	26.7561	27.7659	21.5667	21.9623	21.8406	21.6035	21.9112	21.6731	23.2329	23.2684	23.4075
SmNAC40	root			clum			leaf			flower			ck
target	30.6298	29.4157	29.4772	28.4387	28.526	28.6208	31.6342	30.2703	29.1296	27.2607	25.8093	27.1948	25.8888	26.2209	26.2642
reference	29.9319	29.657	29.8662	20.4295	20.816	21.2599	20.1897	19.8794	19.9742	20.5686	20.4739	20.4552	20.8008	20.8503	20.7204
SmNAC41	root			clum			leaf			flower			ck
target				27.8213	27.9932	27.7014	27.7995	27.8155	27.9898	28.43	29.2455	28.8166	30.7258	30.7458
reference		30.6393	29.985	21.4974	21.7557	21.5572	20.9374	21.3039	21.2102	21.6226	22.6108	21.3031	21.4996	21.3495
SmNAC42	root			clum			leaf			flower			ck
target							33.5213	34.2772	34.185	32.7169	32.4581	32.9241	35.7385
reference	30.7259	29.6348	31.4944	20.5353	21.3527	20.3821	20.6517	19.5718	20.6809	20.4994	20.2909	20.5847	21.2119	20.8888	21.3878
SmNAC43	root			clum			leaf			flower			ck
target				33.781			32.6686			31.0456			33.7983
reference	27.8013	27.7683		20.4826	20.5032	20.527	19.5912	19.5082	19.6675	19.4164	19.7945	19.9808	19.9944	20.5099
SmNAC44	root			clum			leaf			flower			ck
target	36.3628			31.3492	31.4519	31.4209	36.2402			33.481	33.2859	33.6177	37.4412	36.3583	36.6379
reference	29.127	30.3952	30.2476	22.3855	21.7464		21.4573	21.5261	21.8411	20.7831	22.3546	21.6615	28.1261	24.6552	24.4383
SmNAC45	root			clum			leaf			flower			ck
target	34.7324	33.5766		25.414	23.6248	25.9807	22.82	22.8514	23.386	23.6919	23.9574	23.6093	27.4281	27.1834	26.8544
reference	29.4312	29.2238	28.6058	22.1595	21.7921	22.167	21.2538	20.8009	20.463	21.3112	20.919	21.2777	21.4919	21.8716	21.9224
SmNAC46	root			clum			leaf			flower			ck
target	33.7652	35.5726		29.8435	29.3667	31.1706	30.9908	30.9828		28.521	29.744	29.3609	32.6725	32.7531	33.469
reference	32.2328	31.709	31.7405	23.8306	23.6604	23.8107	28.8007	22.5723	22.58	23.6759	23.8671	23.8897	25.939	26.289	26.1678
SmNAC47	root			clum			leaf			flower			ck
target	37.3574			34.4305	34.4911	36.4835	34.5852	33.6335	34.568	30.8754	31.5602	31.3548	36.2155
reference	27.8409	27.5581	29.3777	21.7575	21.7061	21.3943	20.2976	19.9662	19.9989	20.5271	20.3019	19.8532	21.6617	20.9614	20.7026
SmNAC48	root			clum			leaf			flower			ck
target				35.1705	35.8129	35.8673	33.493	34.5004	36.2393	33.7102	33.9792		36.4384
reference	29.5456	29.2838	28.7486	21.6998	21.7229	21.9727	20.585	20.4672	20.2958	20.6937	20.3438	21.0745	20.9165	21.8725	22.0131
SmNAC91	root			clum			leaf			flower			ck
target	31.8866	29.8161	30.9721	26.4662	26.1575	26.7173	23.8851	22.9275	23.3321	25.7869	25.6523	25.7769	28.0325	27.9555	28.2714
reference	29.7565	29.9502	29.3296	22.174	20.8866	21.4298	20.242	20.9239	20.948	22.0687	21.9682	21.8536	24.2555	22.9942	24.3519
SmATAF2	root			clum			leaf			flower			ck
target	31.8516			34.4605	33.8993	31.5392	33.404	31.6777	33.1192	30.3948	31.3772		32.2682	31.4544
reference	32.6161	30.9492	31.9408	22.5624	22.8408	23.2927	21.5257	21.3867	21.4236	22.6796	22.5694	22.6389	25.4157	24.9065	25.124
SmNAC51	root			clum			leaf			flower			ck
target				26.8703	27.2832	26.805	31.128	31.5385	32.2723	23.51	22.436	24.4884	26.8245	27.7388
reference	29.5909	29.716	29.5922	22.1337	22.369	21.6807	20.8633	21.3439	20.7031	22.2756	22.3591	22.1782	20.2409	19.9271	19.9162
SmNAC52	root			clum			leaf			flower			ck
target	34.5614	33.7425	34.5014	27.5238	29.385	29.9455	25.1782						30.9459	30.3563	29.673
reference	29.9386	30.1122	30.9044	21.9489	22.2993	21.8678	22.1353	20.7473	20.2924	22.8596	23.319	22.4743	20.2794	19.9709	20.3506
SmNAC53	root			clum			leaf			flower			ck
target				36.6775			30.4594	31.8309	32.4629	31.4819	31.7374	31.0279	34.4972	33.5151	36.4564
reference	30.8388	30.7214	30.3091	21.9562	21.8803	21.8299	20.2372	19.369	19.525	22.0776	21.9689	22.1933	19.7155	20.1548	19.9066
SmNAC54	root			clum			leaf			flower			ck
target	29.6937	29.8057	28.4371	24.8862	25.0084	24.7215	23.9237	24.3009	23.894	26.4905	25.3367	25.5876	24.3789	23.6429	23.504
reference	29.6767	29.7178	29.776	20.8487	21.281	21.577	20.1292	19.9446	20.2685	20.2421	22.325	29.5733	19.9393	19.5106	19.7518
SmNAC55	root			clum			leaf			flower			ck
target	28.9625	28.7307	28.6413	24.6211	24.4726	24.5344	23.7604	23.2315	22.8912	21.589	21.7506	21.4361	23.7882	24.5035	24.4158
reference	31.2697	31.2585	31.2546	23.8942	24.2331	24.2621	23.2757	22.7867	22.9277	24.2209	24.2895	24.318	25.8058	26.2286	26.1357
SmNAC56	root			clum			leaf			flower			ck
target				29.8775	30.8853	31.8624	30.7	30.9322	30.6074	33.3817	32.38	32.7753	27.6713	28.564	28.5362
reference	30.109	30.2921	30.3809	22.3438	23.5416	24.3337	20.2786	20.2405	18.8133	24.3248	22.6029	22.7101	19.9977	19.5541	20.3626
SmNAC57	root			clum			leaf			flower			ck
target				29.6689	29.6482	29.4372	31.5623	32.6618	31.3429	27.5904	26.685	27.7687	37.5638
reference	30.6934	29.9467	30.2838	23.5599	23.3293	23.5182	22.4708	22.2105	21.4328	22.9681	23.276	21.8608	25.4349	25.516	25.4348
SmNAC58	root			clum			leaf			flower			ck
target	31.3485	31.9802	31.4734	24.8099	25.1544	25.2498	23.7979	23.615	23.461	24.3015	24.2454	24.3436	31.6393	31.6383	31.5917
reference	28.7533	29.381	28.8838	24.2735	24.303	24.0615	22.3734	22.3411	22.4523	24.0254	24.1638	24.1739	22.1794	22.2842	22.2681
SmNAC59	root			clum			leaf			flower			ck
target	34.661			37.3918	34.7198	33.5146	32.868	35.7736		33.892			37.4182
reference	22.6718			21.8076	21.9191	22.2762	20.5199	20.868		22.5092	22.5648		18.9239	20.4539	20.2948
SmNAC60	root			clum			leaf			flower			ck
target	35.6594	35.7531		33.8428	32.9177	32.3338	31.32	32.2441	30.7337	34.8579	34.303	35.47	35.327	34.2725	33.7833
reference	27.804	26.1421		21.8033	22.3341	21.9276	20.6719	19.8453	20.5711	20.7972	22.3106	22.7582	19.9248	19.9531	21.5686
SmNAC61	root			clum			leaf			flower			ck
target	28.6392	27.2007	28.4559	28.6776	28.8135	29.4955	24.5221	24.8251	24.7727	29.6227	27.9427	29.4889	33.7295	34.1944	33.6461
reference	23.3296	22.3631	23.8719	22.7242	21.9355	21.5612	20.8855	21.3952	21.4561	22.3103	22.5357	23.7619	20.6396	21.354	21.6883
SmNAC62	root			clum			leaf			flower			ck
target				26.9109	26.4918	26.4488	22.7776	22.6099	22.2971	22.7646	22.5429	22.3094	29.6205	29.5695	28.7836
reference	33.6107	31.8232	35.3945	21.5993	21.9132	21.8912	21.6387	20.7183	21.6169	22.2042	22.1772	22.1656	21.3286	20.7203	20.5239
SmNAC63	root			clum			leaf			flower			ck
target							37.9668			37.8181	33.7497		36.6105	37.6699
reference	31.6859	30.914	31.3793	22.4713	21.8979	21.7564	23.5106	23.8152	23.5884	22.7053	23.2244	23.2267	20.5325	19.9043	20.9798
SmNAC64	root			clum			leaf			flower			ck
target				29.9792	29.9009	30.5751	31.8187	29.727	31.0953	30.5381	30.4157	28.6689	34.1486	31.5381	31.7909
reference	35.781	33.6232	36.1558	22.5519	22.9603	22.6881	22.7403	24.1196	23.4786	23.3207	22.8199	23.3132	21.3235	21.3565	21.2529
SmNAC65	root			clum			leaf			flower			ck
target	28.1064	29.5378		28.3755	28.3965	28.7605	34.5571	34.9523		30.5938	30.9409	30.4073	29.5194	27.7219	27.7102
reference	22.9189	23.5726		21.9319	21.8595	18.953	23.2904	23.6847	22.5276	20.155	22.1783	22.2238	20.4456	20.1271	20.4779
SmNAC66	root			clum			leaf			flower			ck
target	30.1728	30.14		29.6166	28.8765	29.8747	37.2104	37.5616	36.5901	34.2299	34.6029	34.5764	28.4355
reference	21.2013	22.8741		23.0691	23.2356	23.2379	23.7635	22.845	23.3509	21.7668	22.8458	22.7643	21.5965	21.8652
SmNAC67	root			clum			leaf			flower			ck
target				31.6029	31.3831	31.0167	35.7507	37.9812	36.4968	35.7178	34.9441	37.1436	36.874	35.8189	36.4929
reference	28.7198	29.4794	28.9342	20.5913	21.1403	21.6911	21.9654	22.9129	21.517	21.9206	22.297	22.6143	19.5928	20.5505	20.9951
SmNAC68	root			clum			leaf			flower			ck
target	35.9261	32.8114	35.2204	26.6572	27.9617	26.86	27.8572	27.5817	27.6777	23.9599	25.1783	25.194	28.7614	28.7704	29.9838
reference	29.9512	30.3572	28.9957	22.4688	22.5789	22.5615	23.3292	22.8218	22.9029	22.243	22.6794	22.3517	20.7315	20.5944	19.3965
SmNAC69	root			clum			leaf			flower			ck
target	28.3204	27.7276	27.5419	22.9677	23.1061	23.581	23.2044	24.3349	21.9616	25.2084	23.6318	23.2488	25.8082	25.6074	25.5617
reference	30.6091	31.4581	30.4533	24.5173	23.2255	23.4632	21.4757	21.5526	21.8922	22.8389	22.9148	22.9104	25.1863	25.3352	24.8452
SmNAC70	root			clum			leaf			flower			ck
target	31.8788	32.404	32.7406	25.3417	25.3874	25.3532	25.4899	25.934	26.233	24.4799	24.5365	24.6497	30.9966	30.5337	31.2841
reference	29.8767	29.6487	28.5346	22.8583	22.4047	23.5925	23.3653	24.2583	23.7032	22.8501	22.515	22.3106	20.34	20.1705	20.2462
SmNAC71	root			clum			leaf			flower			ck
target				26.8563	27.2839	26.9902	35.5978	34.9752	34.6796	33.4639	37.6096	34.4312	33.2909	33.5129	33.5888
reference	33.6849	32.9245	33.6138	21.4359	20.9509	21.3579	24.411	24.5497	21.827	22.5586	22.4927	23.2739	20.616	20.6469	20.849
