# Supplementary material for: Transcriptome-wide and expression analysis of the NAC gene family in pepino (Solanum muricatum) during drought stress
Source: PeerJ. 2021 Mar 29;9:e10966. doi: 10.7717/peerj.10966 (PMC8015785; doi:10.7717/peerj.10966)
Supplement: Supplemental Information 2 [file peerj-09-10966-s002.xlsx]

## Sheet: Sheet1
NAC3		8h			12h			18h			24h			ck1			4h			32h			ck2
0.05	target	24.4344	26.9917	26.3975	21.1638	21.0988	22.2717	22.9616	22.4801	22.4115	25.4999	25.6248	26.2625	27.6269	27.5798	28.7396	27.6209	28.8407	28.4523	28.8412	27.9026	26.9044	29.7546	30.6004	28.5395
	reference	22.369	25.058	24.5534	22.9441	22.8996	23.9945	22.9665	22.721	22.5003	23.3258	22.9478	23.6584	23.4198	24.7047	24.5783	24.5544	25.9242	25.8983	25.9545	24.6478	23.5161	26.537	26.7543	25.1878
0.1	target	23.2016	23.5396	24.0958	21.249	22.179	22.5518	23.0372	22.6466	22.7996	22.7775	23.6598	23.0396				28.0936	27.0976	28.3137	29.9549	26.7953	27.8807
	reference	22.1151	22.6783	22.9565	23.9855	24.8794	25.2593	23.9796	23.6634	23.8069	22.7621	23.5112	22.797				26.7397	25.6452	26.7667	28.31	25.3326	26.3393
0.15	target	22.1429	23.0703	22.5281	19.4909	20.5296	21.2785	22.0392	22.6466	22.7996	24.537	24.6925	24.6738				27.3697	28.0634	29.2801	25.6829	26.1014	29.2526
	reference	23.1796	23.9687	23.4336	22.8497	23.8572	24.5784	23.9976	24.6634	24.8069	25.6129	25.8747	25.806				27.9274	28.6186	29.8783	25.46	25.817	28.9482
NAC4		8h			12h			18h			24h			ck1			4h			32h			ck2
0.05	target	21.0579	22.4075	20.7337	19.7994	20.2293	19.4359	18.723	18.5256	18.079	20.5888	20.2995	20.3904	24.631	25.8177	23.9311	24.9342	25.8346	24.5696	23.0712	21.1046	22.59	23.6439	24.2064	25.0648
	reference	20.575	21.9471	20.2197	20.8841	21.4425	20.6311	20.8576	20.671	20.2446	20.4405	20.2989	20.3754	21.2526	22.6979	20.9352	22.416	23.5338	21.9995	22.4333	20.5788	21.7549	20.3697	21.4051	22.1048
0.1	target	21.8497	20.5365	21.4198	19.9837	19.7711	19.6923	19.0376	19.6795	19.75	21.1912	20.2101	20.0884				21.5329	20.7746	22.3863	21.5009	22.0883	21.2393
	reference	22.9608	21.715	22.5787	21.6987	21.501	21.4734	21.869	22.5151	22.5651	22.8216	21.7361	21.5004				21.4009	20.547	22.2025	21.992	22.6299	21.7333
0.15	target	19.5473	19.8631	20.5026	17.9159	17.8214	18.9075	18.8212	18.7405	18.4261	21.001	21.1142	20.3313				20.4795	19.6396	20.6494	20.8604	22.0292	22.7641
	reference	21.2688	21.4701	22.1836	21.2111	21.1378	22.2289	21.7967	21.676	21.3958	21.9886	22.2291	21.477				21.7835	20.7836	21.8481	20.792	21.9196	22.6028
NAC8		8h			12h			18h			24h			ck1			4h			32h			ck2
0.05	target	34.5092	31.5423	31.9343	29.7885	28.3383	28.4395	26.4694	30.3285	29.8384	29.3609	30.1166	31.6941	31.641	31.6984	30.6996	32.936	31.6705	34.4061	33.9269	31.6022		29.5397	29.756	31.453
	reference	29.3597	26.3741	27.16	24.7985	23.3536	23.7419	21.5299	24.9592	24.7616	21.5652	21.7139	22.8633	24.382	25.6019	24.6229	28.5182	26.9675	29.733	25.6963	23.1518		24.5304	23.7094	25.517
0.1	target	29.8167	31.4685		26.6559	26.9935		27.7563	26.5728	25.2528	30.638	30.5353	28.0159				29.1885	29.9399	30.7468	30.9727	31.9123	29.7111
	reference	26.2796	27.8115		22.6097	22.8926		22.7826	21.548	20.4074	23.7347	23.7942	21.391				25.4546	26.398	27.3903	23.4887	24.1269	22.5708
0.15	target	30.4801	26.2614	28.3054	30.3885	30.2665	27.3026	26.5716	24.488	27.3195	24.7342	25.6058	25.5898				31.7869	32.7557		27.6597	27.3567
	reference	26.9317	22.8623	24.8298	27.2994	27.1358	24.4004	24.7967	22.5514	25.4864	21.9304	22.928	22.8261				28.5439	29.3756		25.4556	25.1619
NAC83		8h			12h			18h			24h			ck1			4h			32h			ck2
0.05	target	23.304	26.4091	25.9748	26.6378	26.1387	27.2534	27.2198	30.9199	28.8054	23.5841	24.8245	24.9965	34.2353	34.7849	35.2604	29.6429	28.7746	29.2763	27.2504	29.3292	25.9041	30.6439	30.2064	31.0648
	reference	22.5679	25.9941	25.3024	23.4728	22.4034	24.8161	23.1138	25.315	24.302	21.7944	22.1355	22.4475	30.6575	31.2871	32.4068	32.2009	31.147	31.5325	27.792	29.5096	26.6028	29.3697	28.4051	30.1048
0.1	target	25.9648	24.6813	25.6704	27.9979	26.8527	28.5489	34.5745	29.4783	25.7999	25.9281	24.6634	23.5475				26.9342	27.8346	28.5696	27.0712	28.59	26.1046
	reference	24.9181	23.9372	24.9759	24.3625	22.839	24.4034	30.9428	25.5358	21.8558	24.681	23.8108	22.646				29.416	30.5338	30.9995	28.5433	29.7549	27.4688
0.15	target	28.3993	23.9833		27.4233	28.4863	28.6069	28.3891	31.262	28.828	25.6392	24.5898	27.6991				29.3795	29.2396	28.7594	26.2393	25.3883	27.3009
	reference	26.9642	22.4228		22.5272	23.8453	24.3416	25.4356	28.28	25.8842	24.7728	23.6643	26.7604				31.8735	31.8836	31.4381	27.7299	26.992	28.7333
NAC100		8h			12h			18h			24h			ck1			4h			32h			ck2
0.05	target	26.6543	27.2598	26.562	27.4223	33.8081	30.4912	34.3805	29.1946	27.2904	28.5186	26.657	29.2859	35.6822	35.1875	35.2487	32.6779	31.3402	31.9667	31.3048	31.5449	33.258	37.3305	35.1246
	reference	21.5035	22.2013	21.4004	20.8126	27.4022	24.3441	27.9622	22.6115	20.9504	22.5708	20.5798	23.3629	25.7005	25.3101	25.785	27.9787	26.6015	27.3538	25.5152	25.6702	27.3973	26.7005	25.3101
0.1	target	29.3359	28.3272	26.3268	28.8754	28.8628	29.1903	29.9691	29.0226	28.0469	26.6962	28.7396	28.9054				33.7981	34.1977	32.8543	28.6228	28.7588	30.7304
	reference	25.82	24.8144	22.7681	23.5335	23.3539	23.8923	23.9185	22.89	21.82	21.566	23.6518	23.7347				30.3783	30.8102	29.462	23.181	23.3827	25.416
0.15	target	27.4312	28.3315		27.5872	29.1745	28.4924	30.871	30.8632	30.3955	28.0831	28.963	34.6794				33.0628	33.7283		29.3437	30.5073	28.085
	reference	23.984	24.9072		22.8602	24.5166	23.786	24.9525	25.2485	24.625	22.9994	23.9397	29.6548				29.7306	30.4877		24.2539	25.484	22.9723
NAC91		8h			12h			18h			24h			ck1			4h			32h			ck2
0.05	target	25.2541	30.4715	27.0403	27.4359	26.7815	28.4428	25.2677	25.309	26.1545	31.7623	26.915	24.7386	29.3637	29.8532	30.9548	30.4708	31.3876	32.9979	28.7915	26.9219	30.0769	29.573	30.8208
	reference	21.6248	26.2622	22.9427	22.2985	21.8749	23.2193	20.9207	20.3837	21.4473	27.7813	23.3942	21.3297	24.9937	25.8231	26.5379	26.9781	28.093	28.7061	25.2019	23.5488	26.365	23.6861	25.9755
0.1	target	26.7043	26.6553	26.6039	26.5383	27.5324	28.452	26.3823	28.4869	27.6077	26.3349	26.0711	24.5844				33.5193	33.1037	32.6954	26.3782	26.3109	28.3759
	reference	23.6883	23.4761	23.5063	22.4621	23.3869	24.1665	22.2529	23.9298	23.2959	23.2725	22.8935	21.4368				31.2745	30.409	30.316	23.4069	23.2547	25.4212
0.15	target	25.5328	23.7489	25.3786	26.4201	27.3407	26.5365	28.4477	30.8131	29.958	24.3251	24.6051	27.6596				31.4519	32.6995	32.0446	26.4029	27.2882	25.9653
	reference	23.3272	21.6333	23.2952	23.2296	23.9968	23.277	24.6558	26.8416	25.8972	22.6642	22.5425	25.7609				29.6205	30.7529	29.9343	24.4221	25.2421	23.782
NAC69		8h			12h			18h			24h			ck1			4h			32h			ck2
0.05	target	28.5369	32.3446	30.9744	31.9069	31.7428	30.5857	31.5516	29.7749	32.9367	29.9718	30.6254	31.2022	30.8697	33.9542	32.4176	29.2704	28.1914	30.7569	31.687	31.9507	33.111	30.5064	33.5459	32.2581
	reference	20.8542	24.9215	23.6109	22.1916	22.5398	21.4176	21.7332	20.0514	23.1954	20.3757	20.7832	21.5014	24.5037	26.6876	25.3819	22.2431	21.3277	23.7246	24.1832	24.5674	25.5872	24.5437	26.7152	25.8205
0.1	target	30.4365	29.7336	30.4744	30.7381	33.4869	34.3219	30.7885	29.8547	32.7524	30.9037	31.8116	30.9364				27.3958	28.7673	28.3008	30.0736	28.6092	28.7873
	reference	22.4988	21.5092	22.4292	21.762	23.4542	24.4026	22.5335	21.8809	24.6604	23.238	24.0177	23.2156				20.3649	21.6144	21.39	22.9453	21.4989	21.6933
0.15	target	30.9549	31.258		30.6773	30.592	29.8594	30.5163	30.4743	31.6148	29.7421	30.5749	29.8172				30.2733	31.2489	31.3585	30.0205	29.5736	30.5265
	reference	21.7658	22.3068		22.7491	22.4377	21.6677	22.5589	22.5586	23.5927	22.418	23.2987	22.3211				22.8446	23.5367	23.3932	23.3756	22.9635	23.8444
