# Supplementary material for: Transcriptome-wide and expression analysis of the NAC gene family in pepino (Solanum muricatum) during drought stress
Source: PeerJ. 2021 Mar 29;9:e10966. doi: 10.7717/peerj.10966 (PMC8015785; doi:10.7717/peerj.10966)
Supplement: Supplemental Information 3 [file peerj-09-10966-s003.xlsx]

## Sheet: Sheet1
Primer name	Sequence(5'-3')
SmNAC01-R	CCCAACAATAACAAGGGAACCATCA
SmNAC01-D	TACCATACTTTTTTTCACTCCAATA
SmNAC55-R	AAAGTCAAGCAACATGGGAGATAAG
SmNAC55-D	AGATAAAACCCTACTAGCTCTTCAT
SmNAC03-R	AGTAAGAGTAAACAATCCCGAAGTGAAA
SmNAC03-D	CATCATCACCGAGACCCGAAACAGT
SmNAC04-R	GAGACTGGCGTAGAACCAAAGGATA
SmNAC04-D	CAGTTACACGGCTGACACCTGGGAT
SmNAC05-R	TCAAATTCTCCAAATTATCAGGACCCA
SmNAC05-D	GAGTGTTCTATTTCTTGTCTATTGT
SmNAC06-R	TCTCATCTACATCCTCATCGTCCTG
SmNAC06-D	GTTTTACTTTTCTGCTTGTTGTCAT
SmNAC07-R	CTTGCCACCGATCCGAACTTGACTG
SmNAC07-D	GATGAAAACGCCAAAGAGGAGTAAT
SmNAC08-R	GGTGTTGAACCTCGGGACATTGATT
SmNAC08-D	TTCACATCCTCCACGATAGGCTCAT
SmNAC09-R	TTTCCTGGGCCATTTCTTGCTTGTT
SmNAC09-D	TGTAATAGCCATTTGCTTTGTTTAT
SmNAC10-R	GGTTATTGGAAGGCTACTGGCACTG
SmNAC10-D	ATTCTGCCTTTTCTACACATTTCAT
SmNAC11-R	TTTTCGAGTAGTAGCACTTAGAAGG
SmNAC11-D	CAAACATAATACAACATACACTGAT
SmNAC12-R	CGGCATACCACCCACCCTTCTTCCT
SmNAC12-D	CCTCACCATCACCCTCCGATCCATT
SmNAC13-R	TGATAAGAAGTATGGTAATGGAGCAAGG
SmNAC13-D	AAATCTGAACCCCGGCGCCAACAAT
SmNAC83-R	GGAGAAGTTGGTAAAGACTCGCCCGTTGT
SmNAC83-D	CCAGTAGCCTTCCAATATCCTGAAT
SmNAC15-R	AATGACGCACTTGACCATCCTTGTT
SmNAC15-D	GTGAAACAAGATGGCACAAGACAGG
SmNAC16-R	ATCTTCCCTGAGCACCACAACCTTC
SmNAC16-D	GCCCTTTTGGGCTGCTTTGCATTTA
SmNAC17-R	GTGGAATCTAAAACCTGGAGGAACA
SmNAC17-D	TGTCATTAAGGAAATTGATCTTTAT
SmNAC18-R	ATTAGCAGCCACAACATCAATAGGA
SmNAC18-D	TATTTTGGGTCAATTTCACAACTAT
SmNAC19-R	TGTTACTTTCCAATGTCCTCTTCCGTCTC
SmNAC19-D	ACAACTGATCATAACAATGGAGAAT
SmNAC20-R	TTGGAAGGCTACTGGAACCGATAAA
SmNAC20-D	CAATAACCCGATGTTGCTGCCCGAT
SmNAC21-R	TTTGAGGACGAATGTTACTAAGGGAA
SmNAC21-D	GATAACGATACAATAAGTTCTTCAT
SmNAC22-R	ATCTCCTATCCACCTCATCTAACATCG
SmNAC22-D	CTCTGCGTCTTCAAAACAGTCAAAT
SmNAC23-R	CAAAGTGATACTAAGGGACAAGAAATG
SmNAC23-D	TGTCCATTTGGTGCTCGACCTTTAT
SmNAC24-R	TGCCTTTAGGAGCCTTCCCTGAGTA
SmNAC24-D	CAAGACAATAATCCCTTCAAGTAAT
SmNAC25-R	ATACCCTGCTTCTGTGGC
SmNAC25-D	ATTGGTGAGGTGGATTTG
SmNAC26-R	GGTCTTCCTCCTCTTGCTTCCCTAT
SmNAC26-D	TATTACCCCCTCATCAACCACTAAT
SmNAC27-R	TCTTCCAGGATTACCAGC
SmNAC27-D	AATCTCACTTTTGCCTCA
SmNAC28-R	AACTGGTATTGACAAGCCTGTTTATTC
SmNAC28-D	TTGTTACTCTATTTGGTCTTACACT
SmNAC29-R	GGTAGCCAACAACTGCTGGATGACA
SmNAC29-D	GTTCTCTGAGACAATGGTTTTTAAT
SmNAC30-R	ATCGTGTTCTGACCCTTTCCGTTGA
SmNAC30-D	CCTCTTAATGATTCTACTAATGTAT
SmNAC31-R	AGGAGCCCGCCCTTTGTA
SmNAC31-D	GCCACGACAGCAGGATTT
SmNAC32-R	CCGACCCAAACAGTAAAT
SmNAC32-D	CCCCAACCAAAGAATAAA
SmNAC33-R	CAAATAAGCAAACGCCAATA
SmNAC33-D	AAGGGCCTAAGCTGAATG
SmNAC34-R	AATCTCAAGTCCCACCAG
SmNAC34-D	TGTCCCAAGGCTCAAGCT
SmNAC35-R	ATTTTCTTGCTGACTTTCTTCTTCG
SmNAC35-D	TCTTTTACCCAATAATCAACTTTTC
SmNAC36-R	CAAGAAACCCACCACAGA
SmNAC36-D	TTCTCAAACCTAACACCCTT
SmNAC37-R	GTGAAAGATGGAGCAATAA
SmNAC37-D	GATAGAAGCAGGCAAGGG
SmNAC38-R	GCACCCACCACATCCCTA
SmNAC38-D	CCGGATTCCGCCTGTTTC
SmNAC100-R	CAAGCCCTGAAATGTGAA
SmNAC100-D	CAGTAAAGAATGATTGGGTGAT
SmNAC40-R	AGCCCATTCTCCATAACAAC
SmNAC40-D	TGGTAAACGGAAGCGTAG
SmNAC41-R	ATGGCTTCCACAAGGTGAG
SmNAC41-D	CAACCAAAGAAATCCCAAGA
SmNAC42-R	TTCTCCCATCTTCGCTTT
SmNAC42-D	TTAGGTTCCATCCGACAG
SmNAC43-R	TCTTTACAGAATTGAGCC
SmNAC43-D	CGATTCGTCCGAGTTCCT
SmNAC44-R	CAAACTCATCCTCCTTGC
SmNAC44-D	GTTATTGTCCTATGGTGGTG
SmNAC45-R	ATCCCTCTGCTGCTCTTT
SmNAC45-D	AGCCGTGAACTTCTCCTT
SmNAC46-R	TGCCTCTGAGCCTATTGA
SmNAC46-D	AGGAAAGGACAGCGGTAA
SmNAC47-R	TTTCTTGATTTGCCCTGA
SmNAC47-D	CCAACCAGCTCTTCATCT
SmNAC48-R	CGGAGTCGGAGGAGAAAA
SmNAC48-D	ACGATAACCCGTTGGAAA
SmNAC91-R	GTATCCTCGTTCTGTTGC
SmNAC91-D	GCCTGATTTGTCTGTTGT
SmATAF2-R	CTGGCTGCTGCTTTGTTA
SmATAF2-D	TATTGCCTGGTTTGTGCT
SmNAC51-R	AAACCCGTAATGTTGTAG
SmNAC51-D	CATAATACCCAATCTTCC
SmNAC52-R	CGACAAATAACCCAACCT
SmNAC52-D	AGAGCACCTCATGGACAA
SmNAC53-R	GAAGGTAAACCTCCCAAA
SmNAC53-D	AAATCCTACATAGAACCCAATC
SmNAC54-R	CAGCAAGTCAAACAGGGT
SmNAC54-D	GGGGTTCAGGAGTCACAG
SmNAC02-R	GGCGGTCTTGTTGAAACTGAAA
SmNAC02-D	GGCGGTGAGCGAAGGTGAT
SmNAC56-R	ACCTGCTGGTTGGTTAGT
SmNAC56-D	AATGTCTGGTTCCGTTTC
SmNAC57-R	AGCGATAACTGTGGGTGT
SmNAC57-D	CTACGGTGAAGAAGAGCC
SmNAC58-R	CTGAGGTGCTGTGGGACA
SmNAC58-D	TAATCATTGCCAACATAAGG
SmNAC59-R	AAATGAACGAATGGGCTA
SmNAC59-D	CCACCACAACCTTTACGA
SmNAC60-R	TCCTTTGGTTTCAGTGCC
SmNAC60-D	TTCCATTGCCAACATCAT
SmNAC61-R	CCAGGCTTCCGCTTTCAC
SmNAC61-D	TCCCAAGGATCATGTCGA
SmNAC62-R	TGAACCTTGGGATCTTCC
SmNAC62-D	GTTGCCCTGTTTGTCCTC
SmNAC63-R	AATCTTTACGTGCTTGTG
SmNAC63-D	ATTATTTGGGTTTGCTGA
SmNAC64-R	AATGACCGTGCTTAGAAA
SmNAC64-D	ACCCAAAGAATCACCTCA
SmNAC65-R	GCCTTCCAGTACCCAGCT
SmNAC65-D	CTCGTGATCGTAAATACCCTAA
SmNAC66-R	TATCTTCCTCCACATCTT
SmNAC66-D	GGTTCACATTACTATCCC
SmNAC67-R	GCTAATTCCCAAGGCTCA
SmNAC67-D	ACTACCTCCTGGTTTCCG
SmNAC68-R	GTACCGATTCATCAACCG
SmNAC68-D	TGGATGAAATCGAAATCC
SmNAC69-R	TGCAGACCTTGCTCCTAG
SmNAC69-D	ATAACTCCGCCTCCACTC
SmNAC70-R	AAGTTTCCAGCAGGCATA
SmNAC70-D	AGCACCCAGACATTTGAT
SmNAC71-R	GCTACTTGGTGAAGGTGA
SmNAC71-D	TTGGAATGAAGAAATACTATGC
