# Supplementary material for: Transcriptome-wide and expression analysis of the NAC gene family in pepino (Solanum muricatum) during drought stress
Source: PeerJ. 2021 Mar 29;9:e10966. doi: 10.7717/peerj.10966 (PMC8015785; doi:10.7717/peerj.10966)
Supplement: Supplemental Information 6 — Gene annotation and Pfam annotation. [file peerj-09-10966-s006.xlsx]

## Sheet: Sheet1
#ID		Gene name		GO_annotation	Pfam_annotation
Unigene_7073		SmNAC001		Molecular Function: DNA binding (GO:0003677);; Biological Process: regulation of transcription, DNA-templated (GO:0006355);;	No apical meristem (NAM) protein
Unigene_72927		SmNAC055		Molecular Function: DNA binding (GO:0003677);; Biological Process: aromatic compound biosynthetic process (GO:0019438);; Biological Process: multicellular organismal process (GO:0032501);; Biological Process: cellular macromolecule biosynthetic process (GO:0034645);; Biological Process: primary metabolic process (GO:0044238);; Biological Process: cell wall organization or biogenesis (GO:0071554);…	No apical meristem (NAM) protein
Unigene_57872		SmNAC003		Molecular Function: DNA binding (GO:0003677);; Molecular Function: sequence-specific DNA binding transcription factor activity (GO:0003700);; Biological Process: response to stimulus (GO:0050896);; Biological Process: trehalose biosynthetic process (GO:0005992);; Biological Process: regulation of transcription, DNA-templated (GO:0006355);; Biological Process: proline biosynthetic process (GO:0006…	No apical meristem (NAM) protein
Unigene_37300		SmNAC004		Molecular Function: DNA binding (GO:0003677);; Biological Process: regulation of transcription, DNA-templated (GO:0006355);;	No apical meristem (NAM) protein
Unigene_45061		SmNAC005		Molecular Function: DNA binding (GO:0003677);; Molecular Function: sequence-specific DNA binding transcription factor activity (GO:0003700);; Cellular Component: nucleus (GO:0005634);; Biological Process: regulation of transcription, DNA-templated (GO:0006355);; Biological Process: plant-type secondary cell wall biogenesis (GO:0009834);;	No apical meristem (NAM) protein
Unigene_22092		SmNAC006		Molecular Function: DNA binding (GO:0003677);; Biological Process: regulation of transcription, DNA-templated (GO:0006355);; Biological Process: response to stress (GO:0006950);; Biological Process: response to abiotic stimulus (GO:0009628);; Biological Process: response to organic substance (GO:0010033);; Biological Process: response to oxygen-containing compound (GO:1901700);;	No apical meristem (NAM) protein
Unigene_1150		SmNAC007		Biological Process: regulation of cell cycle process (GO:0010564);; Biological Process: response to stimulus (GO:0050896);;	No apical meristem (NAM) protein
Unigene_35469		SmNAC008		Molecular Function: DNA binding (GO:0003677);; Molecular Function: sequence-specific DNA binding transcription factor activity (GO:0003700);; Cellular Component: nucleus (GO:0005634);; Biological Process: response to stimulus (GO:0050896);; Biological Process: regulation of transcription, DNA-templated (GO:0006355);; Biological Process: plant-type secondary cell wall biogenesis (GO:0009834);; Bio…	No apical meristem (NAM) protein
Unigene_36411		SmNAC009		Molecular Function: DNA binding (GO:0003677);; Molecular Function: sequence-specific DNA binding transcription factor activity (GO:0003700);; Biological Process: regulation of transcription, DNA-templated (GO:0006355);; Biological Process: multicellular organismal development (GO:0007275);;	No apical meristem (NAM) protein
Unigene_41035		SmNAC010		Molecular Function: DNA binding (GO:0003677);; Biological Process: regulation of transcription, DNA-templated (GO:0006355);;	No apical meristem (NAM) protein
Unigene_41763		SmNAC011		Molecular Function: DNA binding (GO:0003677);; Biological Process: regulation of transcription, DNA-templated (GO:0006355);; Biological Process: response to stress (GO:0006950);; Biological Process: response to abiotic stimulus (GO:0009628);; Biological Process: response to organic substance (GO:0010033);; Biological Process: response to oxygen-containing compound (GO:1901700);;	No apical meristem (NAM) protein
Unigene_38575		SmNAC012		Molecular Function: DNA binding (GO:0003677);; Biological Process: response to stimulus (GO:0050896);; Biological Process: regulation of transcription, DNA-templated (GO:0006355);; Biological Process: regulation of cell cycle process (GO:0010564);;	No apical meristem (NAM) protein
Unigene_53686		SmNAC013		Molecular Function: DNA binding (GO:0003677);; Biological Process: regulation of transcription, DNA-templated (GO:0006355);; Biological Process: response to stress (GO:0006950);; Biological Process: response to abiotic stimulus (GO:0009628);; Biological Process: response to organic substance (GO:0010033);; Biological Process: response to oxygen-containing compound (GO:1901700);;	No apical meristem (NAM) protein
Unigene_44664		SmNAC083		Molecular Function: DNA binding (GO:0003677);; Biological Process: regulation of transcription, DNA-templated (GO:0006355);; Biological Process: cell wall biogenesis (GO:0042546);; Biological Process: xylan metabolic process (GO:0045491);;	No apical meristem (NAM) protein
Unigene_46679		SmNAC015		Molecular Function: DNA binding (GO:0003677);; Biological Process: regulation of transcription, DNA-templated (GO:0006355);;	No apical meristem (NAM) protein
Unigene_52596		SmNAC016		Molecular Function: DNA binding (GO:0003677);; Cellular Component: nucleus (GO:0005634);; Biological Process: regulation of transcription, DNA-templated (GO:0006355);; Biological Process: response to water deprivation (GO:0009414);; Biological Process: response to abscisic acid (GO:0009737);;	No apical meristem (NAM) protein
Unigene_59704		SmNAC017		Molecular Function: DNA binding (GO:0003677);; Biological Process: regulation of transcription, DNA-templated (GO:0006355);;	No apical meristem (NAM) protein
Unigene_48940		SmNAC018		Molecular Function: DNA binding (GO:0003677);; Biological Process: regulation of transcription, DNA-templated (GO:0006355);;	No apical meristem (NAM) protein
Unigene_55960		SmNAC019		Molecular Function: DNA binding (GO:0003677);; Biological Process: shoot system development (GO:0048367);; Biological Process: response to stimulus (GO:0050896);; Biological Process: regulation of transcription, DNA-templated (GO:0006355);;	No apical meristem (NAM) protein
Unigene_51574		SmNAC020		Biological Process: regulation of transcription, DNA-templated (GO:0006355);; Biological Process: cell wall biogenesis (GO:0042546);; Biological Process: xylan metabolic process (GO:0045491);;	No apical meristem (NAM) protein
Unigene_36445		SmNAC021		Molecular Function: DNA binding (GO:0003677);; Biological Process: regulation of transcription, DNA-templated (GO:0006355);;	No apical meristem (NAM) protein
Unigene_50037		SmNAC022		Molecular Function: DNA binding (GO:0003677);; Biological Process: regulation of transcription, DNA-templated (GO:0006355);;	No apical meristem (NAM) protein
Unigene_36781		SmNAC023		Molecular Function: DNA binding (GO:0003677);; Biological Process: regulation of transcription, DNA-templated (GO:0006355);; Biological Process: xylem development (GO:0010089);;	No apical meristem (NAM) protein
Unigene_51892		SmNAC024		Molecular Function: DNA binding (GO:0003677);; Biological Process: regulation of transcription, DNA-templated (GO:0006355);;	No apical meristem (NAM) protein
Unigene_43816		SmNAC025		Molecular Function: DNA binding (GO:0003677);; Biological Process: regulation of transcription, DNA-templated (GO:0006355);;	No apical meristem (NAM) protein
Unigene_55189		SmNAC026		Molecular Function: DNA binding (GO:0003677);; Molecular Function: sequence-specific DNA binding transcription factor activity (GO:0003700);; Molecular Function: protein binding (GO:0005515);; Cellular Component: nucleus (GO:0005634);; Biological Process: protein targeting to membrane (GO:0006612);; Biological Process: multicellular organismal development (GO:0007275);; Biological Process: respon…	No apical meristem (NAM) protein
Unigene_41861		SmNAC027		Molecular Function: DNA binding (GO:0003677);; Biological Process: regulation of transcription, DNA-templated (GO:0006355);;	No apical meristem (NAM) protein
Unigene_37786		SmNAC028		Molecular Function: DNA binding (GO:0003677);; Cellular Component: nucleus (GO:0005634);; Biological Process: response to cytokinin (GO:0009735);; Biological Process: response to abscisic acid (GO:0009737);; Biological Process: response to brassinosteroid (GO:0009741);; Biological Process: xylem development (GO:0010089);; Biological Process: positive regulation of transcription, DNA-templated (GO…	No apical meristem (NAM) protein
Unigene_38283		SmNAC029		Molecular Function: DNA binding (GO:0003677);; Biological Process: regulation of transcription, DNA-templated (GO:0006355);;	No apical meristem (NAM) protein
Unigene_24841		SmNAC030		Molecular Function: DNA binding (GO:0003677);; Biological Process: regulation of transcription, DNA-templated (GO:0006355);; Biological Process: xylem development (GO:0010089);;	No apical meristem (NAM) protein
Unigene_10398		SmNAC031		Molecular Function: DNA binding (GO:0003677);; Biological Process: regulation of transcription, DNA-templated (GO:0006355);; Biological Process: response to wounding (GO:0009611);; Biological Process: negative regulation of abscisic acid-activated signaling pathway (GO:0009788);;	No apical meristem (NAM) protein
Unigene_49342		SmNAC032		Molecular Function: DNA binding (GO:0003677);; Biological Process: regulation of transcription, DNA-templated (GO:0006355);;	No apical meristem (NAM) protein
Unigene_40884		SmNAC033		Molecular Function: DNA binding (GO:0003677);; Biological Process: regulation of transcription, DNA-templated (GO:0006355);; Biological Process: response to wounding (GO:0009611);; Biological Process: negative regulation of abscisic acid-activated signaling pathway (GO:0009788);;	No apical meristem (NAM) protein
Unigene_55942		SmNAC034		Molecular Function: DNA binding (GO:0003677);; Biological Process: regulation of transcription, DNA-templated (GO:0006355);;	No apical meristem (NAM) protein
Unigene_25059		SmNAC035		Molecular Function: DNA binding (GO:0003677);; Biological Process: regulation of transcription, DNA-templated (GO:0006355);;	No apical meristem (NAM) protein
Unigene_41989		SmNAC036		Molecular Function: DNA binding (GO:0003677);; Cellular Component: nucleus (GO:0005634);; Biological Process: regulation of transcription, DNA-templated (GO:0006355);; Biological Process: response to chitin (GO:0010200);;	No apical meristem (NAM) protein
Unigene_44411		SmNAC037		Molecular Function: DNA binding (GO:0003677);; Biological Process: regulation of transcription, DNA-templated (GO:0006355);; Biological Process: response to hormone (GO:0009725);;	No apical meristem (NAM) protein
Unigene_18479		SmNAC038		Molecular Function: DNA binding (GO:0003677);; Molecular Function: sequence-specific DNA binding transcription factor activity (GO:0003700);; Biological Process: multicellular organismal development (GO:0007275);; Biological Process: glucuronoxylan metabolic process (GO:0010413);; Molecular Function: transferase activity, transferring phosphorus-containing groups (GO:0016772);; Biological Process…	No apical meristem (NAM) protein
Unigene_50306		SmNAC100		Biological Process: MAPK cascade (GO:0000165);; Molecular Function: DNA binding (GO:0003677);; Molecular Function: sequence-specific DNA binding transcription factor activity (GO:0003700);; Cellular Component: nucleus (GO:0005634);; Biological Process: regulation of transcription, DNA-templated (GO:0006355);; Biological Process: defense response, incompatible interaction (GO:0009814);; Biological…	No apical meristem (NAM) protein
Unigene_48920		SmNAC040		Molecular Function: DNA binding (GO:0003677);; Biological Process: regulation of transcription, DNA-templated (GO:0006355);;	No apical meristem (NAM) protein
Unigene_36801		SmNAC041		Biological Process: regionalization (GO:0003002);; Molecular Function: DNA binding (GO:0003677);; Molecular Function: sequence-specific DNA binding transcription factor activity (GO:0003700);; Cellular Component: nucleus (GO:0005634);; Biological Process: regulation of transcription, DNA-templated (GO:0006355);; Biological Process: plant-type secondary cell wall biogenesis (GO:0009834);; Biologic…	No apical meristem (NAM) protein
Unigene_20151		SmNAC042		Molecular Function: DNA binding (GO:0003677);; Biological Process: regulation of transcription, DNA-templated (GO:0006355);;	No apical meristem (NAM) protein
Unigene_14038		SmNAC043		Molecular Function: DNA binding (GO:0003677);; Molecular Function: sequence-specific DNA binding transcription factor activity (GO:0003700);; Biological Process: regulation of transcription, DNA-templated (GO:0006355);; Biological Process: multicellular organismal development (GO:0007275);; Biological Process: xylem development (GO:0010089);; Biological Process: cell wall macromolecule metabolic …	No apical meristem (NAM) protein
Unigene_40192		SmNAC044		Molecular Function: DNA binding (GO:0003677);; Molecular Function: sequence-specific DNA binding transcription factor activity (GO:0003700);; Biological Process: regulation of transcription, DNA-templated (GO:0006355);; Biological Process: multicellular organismal development (GO:0007275);;	No apical meristem (NAM) protein
Unigene_52638		SmNAC045		Molecular Function: transcription coactivator activity (GO:0003713);; Cellular Component: intracellular (GO:0005622);; Molecular Function: zinc ion binding (GO:0008270);;	No apical meristem (NAM) protein
Unigene_45973		SmNAC046		Molecular Function: DNA binding (GO:0003677);; Biological Process: regulation of transcription, DNA-templated (GO:0006355);;	No apical meristem (NAM) protein
Unigene_58621		SmNAC047		Molecular Function: DNA binding (GO:0003677);; Biological Process: regulation of transcription, DNA-templated (GO:0006355);;	No apical meristem (NAM) protein
Unigene_13476		SmNAC048		Molecular Function: DNA binding (GO:0003677);; Molecular Function: sequence-specific DNA binding transcription factor activity (GO:0003700);; Cellular Component: nucleus (GO:0005634);; Biological Process: regulation of transcription, DNA-templated (GO:0006355);; Biological Process: auxin-activated signaling pathway (GO:0009734);; Biological Process: primary shoot apical meristem specification (GO…	No apical meristem (NAM) protein
Unigene_47699		SmNAC091		Biological Process: MAPK cascade (GO:0000165);; Molecular Function: DNA binding (GO:0003677);; Molecular Function: sequence-specific DNA binding transcription factor activity (GO:0003700);; Cellular Component: nucleus (GO:0005634);; Biological Process: regulation of transcription, DNA-templated (GO:0006355);; Biological Process: defense response, incompatible interaction (GO:0009814);; Biological…	No apical meristem (NAM) protein
Unigene_44135		SmATAF2		Molecular Function: DNA binding (GO:0003677);; Molecular Function: transcription coactivator activity (GO:0003713);; Molecular Function: zinc ion binding (GO:0008270);; Cellular Component: intracellular (GO:0005622);; Biological Process: regulation of transcription, DNA-templated (GO:0006355);;	No apical meristem (NAM) protein
Unigene_26044		SmNAC051		Molecular Function: DNA binding (GO:0003677);; Biological Process: regulation of transcription, DNA-templated (GO:0006355);;	No apical meristem (NAM) protein
Unigene_26556		SmNAC052		Molecular Function: DNA binding (GO:0003677);; Biological Process: regulation of transcription, DNA-templated (GO:0006355);;	No apical meristem (NAM) protein
Unigene_37192		SmNAC053		Molecular Function: DNA binding (GO:0003677);; Biological Process: regulation of transcription, DNA-templated (GO:0006355);; Biological Process: cellular process (GO:0009987);;	No apical meristem (NAM) protein
Unigene_46049		SmNAC054		Molecular Function: DNA binding (GO:0003677);; Biological Process: regulation of transcription, DNA-templated (GO:0006355);;	No apical meristem (NAM) protein
Unigene_39126		SmNAC002		Molecular Function: DNA binding (GO:0003677);; Molecular Function: sequence-specific DNA binding transcription factor activity (GO:0003700);; Cellular Component: nucleus (GO:0005634);; Biological Process: regulation of transcription, DNA-templated (GO:0006355);; Biological Process: multicellular organismal development (GO:0007275);;	No apical meristem (NAM) protein
Unigene_50250		SmNAC056		Molecular Function: DNA binding (GO:0003677);; Biological Process: regulation of transcription, DNA-templated (GO:0006355);;	No apical meristem (NAM) protein
Unigene_37439		SmNAC057		Molecular Function: DNA binding (GO:0003677);; Molecular Function: sequence-specific DNA binding transcription factor activity (GO:0003700);; Biological Process: regulation of transcription, DNA-templated (GO:0006355);; Biological Process: multicellular organismal development (GO:0007275);;	No apical meristem (NAM) protein
Unigene_45259		SmNAC058		Molecular Function: DNA binding (GO:0003677);; Biological Process: regulation of transcription, DNA-templated (GO:0006355);;	No apical meristem (NAM) protein
Unigene_44587		SmNAC059		Molecular Function: DNA binding (GO:0003677);; Biological Process: regulation of transcription, DNA-templated (GO:0006355);;	No apical meristem (NAM) protein
Unigene_47115		SmNAC060		Molecular Function: DNA binding (GO:0003677);; Biological Process: regulation of transcription, DNA-templated (GO:0006355);;	No apical meristem (NAM) protein
Unigene_47066		SmNAC061		Molecular Function: DNA binding (GO:0003677);; Biological Process: regulation of transcription, DNA-templated (GO:0006355);; Biological Process: transport (GO:0006810);; Biological Process: single-organism process (GO:0044699);;	No apical meristem (NAM) protein
Unigene_44974		SmNAC062		Molecular Function: DNA binding (GO:0003677);; Biological Process: regulation of transcription, DNA-templated (GO:0006355);;	No apical meristem (NAM) protein
Unigene_68670		SmNAC063		Molecular Function: DNA binding (GO:0003677);; Biological Process: regulation of transcription, DNA-templated (GO:0006355);;	No apical meristem (NAM) protein
Unigene_48080		SmNAC064		Molecular Function: sequence-specific DNA binding transcription factor activity (GO:0003700);; Cellular Component: nucleus (GO:0005634);; Biological Process: multicellular organismal development (GO:0007275);;	No apical meristem (NAM) protein
Unigene_68727		SmNAC065		Molecular Function: DNA binding (GO:0003677);; Biological Process: regulation of transcription, DNA-templated (GO:0006355);;	No apical meristem (NAM) protein
Unigene_41672		SmNAC066		Molecular Function: DNA binding (GO:0003677);; Biological Process: regulation of transcription, DNA-templated (GO:0006355);;	No apical meristem (NAM) protein
Unigene_37289		SmNAC067		Molecular Function: DNA binding (GO:0003677);; Biological Process: regulation of transcription, DNA-templated (GO:0006355);; Biological Process: pattern specification process (GO:0007389);; Biological Process: organ morphogenesis (GO:0009887);; Biological Process: meristem development (GO:0048507);;	No apical meristem (NAM) protein
Unigene_43276		SmNAC068		Molecular Function: DNA binding (GO:0003677);; Biological Process: regulation of transcription, DNA-templated (GO:0006355);;	No apical meristem (NAM) protein
Unigene_32175		SmNAC069		Molecular Function: DNA binding (GO:0003677);; Biological Process: regulation of transcription, DNA-templated (GO:0006355);;	No apical meristem (NAM) protein
Unigene_49369		SmNAC070		Molecular Function: DNA binding (GO:0003677);; Molecular Function: sequence-specific DNA binding transcription factor activity (GO:0003700);; Biological Process: trehalose biosynthetic process (GO:0005992);; Biological Process: regulation of transcription, DNA-templated (GO:0006355);; Biological Process: proline biosynthetic process (GO:0006561);; Biological Process: systemic acquired resistance …	No apical meristem (NAM) protein
Unigene_65477		SmNAC071		Molecular Function: DNA binding (GO:0003677);; Biological Process: regulation of transcription, DNA-templated (GO:0006355);;	No apical meristem (NAM) protein
